# Supplementary material
Source: PubMed Central journal article supplement (PMC2689973)
Supplement: pp.109.135368_1.pdf [file pp.109.135368_1.pdf]

### Supplemental Table SI: Primers used in this study

Primers used for checking transcripts across T-DNA or Ds insertion sites were indicated in the figures. Primers used for real-time quantitative RT-PCR were as follows: H3G-F and H3G-R for *H3G*, UBQ-F and UBQ-R for *UBQ10*, qCHLI1-F and qCHLI1-R for *CHLI1*, qCHLI2-F and qCHLI2-R for *CHLI2*, and CAB-F and CAB-R for *Lhcb1*.

1F, 5'-acaaaaatggcgtctcttcttga  
1R, 5'-attcagctgaaaatctcggcgaact  
Syngenta LB3, 5'-tcgcattcgaattcataccaatctcgatacac  
2F, 5'-tagcaatggcgtctcttctcggaa  
2F-1, 5'-ctccaaggaagagatcaagttacagct  
2R, 5'-tcccgaatccatagactccaatgga  
GT, 5'-accgaccggatcgtatcgg  
DF, 5'-atggcgatgactccggtcgcgt  
DF-1 5'-ctagatcaatagcaatggcaagga  
DR, 5'-tccttgccattgctattgatctag  
DR-1, 5'-gaagagacatccctgccttgatata  
HF, 5'-agccgtgcaatctctcaacaaga  
HF-1, 5'-atgaaggtgatcccatgaggct  
HR, 5'-atggtagcttcagagggttga  
SALK LBa1, 5'-tggttcacgtagtgggccaatcg  
*KpnI*-CHLI1F, 5'-cccggtagctgaacatctgtgtttgccttgg  
*KpnI*-CHLI2R, 5'-cccggtagcttctgacttgatctgattgagaa  
P1, 5'-gttgttgataaggagatgatttctctctatctc  
P2, 5'-gagatagaggaggaaatcatctccttatccaacaac  
H3G-F, 5'- aaccactggaggagtcaaga  
H3G-R, 5'- caattaagcacgttctcctct  
1-1, 5'-tctcgcactcttctttgaaatca  
1-2, 5'-agggattctttatgttgatgaa  
UBQ10-F, 5'- cttcgtcaagactttgaccg  
UBQ10-R, 5'- cttcttaagcataacagagacgag  
qCHLI 1-F, 5'-ccggcgagggtttatct  
qCHLI 1-R, 5'-tttgaagtgtcacggaaat  
qCHLI 2-F, 5'-tcttgacctgccctcg  
qCHLI 2-R, 5'-gcagcaaacggataaaca  
CAB-F, 5'-aatgaggaagactgttgc  
CAB-R, 5'-ccacctgctgtggataa
